# Supplementary material
Source: MDPI journal article supplement (https://www.mdpi.com/2072-4292/8/9/780)
Supplement: s1 [file s1]

Archive with 3 entries (3 files):
- annex_I.pdf
- annex_II.pdf
- annex_III_Species_composition_HFT_Sierra_Nevada.pdf
