# Supplementary material
Source: MDPI journal article supplement (https://www.mdpi.com/2072-4292/8/9/780)
Supplement: s1 [file s1]

# Sierra Nevada NP

| Species Name                                 | HFT |
|----------------------------------------------|-----|
| <i>Arenaria tetraquetra</i>                  | 3   |
| <i>Arenaria pungens</i>                      | 3   |
| <i>Cytisus galianoi</i>                      | 3   |
| <i>Thymus serpylloides</i>                   | 3   |
| <i>Juniperus communis subsp. nana</i>        | 3   |
| <i>Tamarix</i>                               | 1   |
| <i>Eucalyptus camaldulensis</i>              | 1   |
| <i>Arenaria montana subsp. intricata</i>     | 3   |
| <i>Rhamnus pumilus</i>                       | 3   |
| <i>Hormathophylla spinosa</i>                | 3   |
| <i>Helichrysum stoechas</i>                  | 1   |
| <i>Thymelaea hirsuta</i>                     | 1   |
| <i>Thymus zygis</i>                          | 1   |
| <i>Coridothymus capitatus</i>                | 1   |
| <i>Cistus clusii</i>                         | 1   |
| <i>Ulex parviflorus</i>                      | 1   |
| <i>Lavandula lanata</i>                      | 1   |
| <i>Armeria splendens</i>                     | 3   |
| <i>Herniaria boissieri</i>                   | 3   |
| <i>Tamarix canariensis</i>                   | 1   |
| <i>Vaccinium uliginosum var. nana</i>        | 3   |
| <i>Rosmarinus officinalis</i>                | 1   |
| <i>Asparagus acutifolius</i>                 | 1   |
| <i>Helianthemum lavandulifolium</i>          | 1   |
| <i>Halimium atriplicifolium</i>              | 1   |
| <i>Genista speciosa</i>                      | 1   |
| <i>Phlomis crinita</i>                       | 1   |
| <i>Quercus coccifera</i>                     | 1   |
| <i>Asparagus stipularis</i>                  | 1   |
| <i>Phlomis lychnitis</i>                     | 1   |
| <i>Fumana thymifolia</i>                     | 1   |
| <i>Thymus zygis subsp. gracilis</i>          | 1   |
| <i>Thymus baeticus</i>                       | 1   |
| <i>Ziziphora acinoides</i>                   | 1   |
| <i>Teucrium polium subsp. montanum</i>       | 1   |
| <i>Thymelaea tartonraira</i>                 | 1   |
| <i>Arenaria armerina subsp. caesia</i>       | 1   |
| <i>Dianthus hispanicus var. australis</i>    | 1   |
| <i>Helianthemum cinereum subsp. rubellum</i> | 1   |
| <i>Thymus granatensis</i>                    | 1   |
| <i>Teucrium capitatum</i>                    | 1   |
| <i>Artemisia glutinosa</i>                   | 1   |
| <i>Crataegus monogyna subsp. brevispina</i>  | 1   |
| <i>Santolina canescens</i>                   | 1   |
| <i>Anthyllis tejedensis</i>                  | 1   |

# Sierra Nevada NP

|                                                           |   |
|-----------------------------------------------------------|---|
| <i>Helianthemum viscidulum</i>                            | 1 |
| <i>Fumana ericoides</i>                                   | 1 |
| <i>Sideritis incana</i> subsp. <i>virgata</i>             | 1 |
| <i>Echinospartum boissieri</i>                            | 1 |
| <i>Erinacea anthyllis</i>                                 | 1 |
| <i>Salvia oxyodon</i>                                     | 1 |
| <i>Arenaria modesta</i>                                   | 1 |
| <i>Erodium boissieri</i>                                  | 1 |
| <i>Helianthemum croceum</i> subsp. <i>croceum</i>         | 1 |
| <i>Helianthemum pannosum</i>                              | 1 |
| <i>Helianthemum salicifolium</i>                          | 2 |
| <i>Ulex parviflorus</i>                                   | 2 |
| <i>Thymus mastichina</i>                                  | 2 |
| <i>Rhamnus alaternus</i>                                  | 2 |
| <i>Santolina chamaecyparissus</i> subsp. <i>squarrosa</i> | 2 |
| <i>Daphne gnidium</i>                                     | 2 |
| <i>Quercus ilex</i> subsp. <i>ballota</i>                 | 2 |
| <i>Genista cinerea</i> subsp. <i>speciosa</i>             | 2 |
| <i>Rubus ulmifolius</i>                                   | 1 |
| <i>Dorycnium rectum</i>                                   | 1 |
| <i>Helichrysum serotinum</i>                              | 2 |
| <i>Santolina canescens</i>                                | 2 |
| <i>Juniperus phoenicea</i>                                | 1 |
| <i>Juniperus oxycedrus</i>                                | 1 |
| <i>Arenaria grandiflora</i>                               | 1 |
| <i>Pinus pinaster</i>                                     | 1 |
| <i>Rhamnus myrtifolius</i>                                | 1 |
| <i>Quercus ilex</i> subsp. <i>ballota</i>                 | 1 |
| <i>Bupleurum gibraltaricum</i>                            | 1 |
| <i>Rhamnus lycioides</i> subsp. <i>velutinus</i>          | 1 |
| <i>Pistacia terebinthus</i>                               | 1 |
| <i>Dianthus malacitanus</i>                               | 1 |
| <i>Teucrium rotundifolium</i>                             | 2 |
| <i>Helianthemum cinereum</i> subsp. <i>rubellum</i>       | 2 |
| <i>Helianthemum viscidulum</i>                            | 2 |
| <i>Lavandula lanata</i>                                   | 2 |
| <i>Helianthemum croceum</i> subsp. <i>estevei</i>         | 2 |
| <i>Thymus zygis</i> subsp. <i>gracilis</i>                | 2 |
| <i>Teucrium rotundifolium</i>                             | 1 |
| <i>Erica erigena</i>                                      | 1 |
| <i>Thymus longiflorus</i>                                 | 1 |
| <i>Retama sphaerocarpa</i>                                | 1 |
| <i>Lavandula stoechas</i> subsp. <i>caesia</i>            | 1 |
| <i>Thymus mastichina</i>                                  | 1 |
| <i>Argyrolobium zanonii</i>                               | 1 |
| <i>Helichrysum serotinum</i>                              | 1 |

# Sierra Nevada NP

|                                                        |   |
|--------------------------------------------------------|---|
| <i>Dianthus hispanicus</i> var. <i>australis</i>       | 2 |
| <i>Lavandula stoechas</i> subsp. <i>caesia</i>         | 2 |
| <i>Ononis speciosa</i>                                 | 2 |
| <i>Artemisia glutinosa</i>                             | 2 |
| <i>Cistus albidus</i>                                  | 1 |
| <i>Juniperus oxycedrus</i>                             | 2 |
| <i>Rhamnus myrtifolius</i>                             | 2 |
| <i>Genista speciosa</i>                                | 2 |
| <i>Berberis hispanica</i>                              | 2 |
| <i>Asparagus acutifolius</i>                           | 2 |
| <i>Dorycnium hirsutum</i>                              | 2 |
| <i>Salix atrocinerea</i>                               | 2 |
| <i>Arbutus unedo</i>                                   | 2 |
| <i>Coriaria myrtifolia</i>                             | 2 |
| <i>Lonicera periclymenum</i> subsp. <i>hispanica</i>   | 2 |
| <i>Rubus ulmifolius</i>                                | 2 |
| <i>Marrubium supinum</i>                               | 2 |
| <i>Crataegus monogyna</i> subsp. <i>brevispina</i>     | 2 |
| <i>Genista versicolor</i>                              | 2 |
| <i>Bupleurum spinosum</i>                              | 2 |
| <i>Amelanchier ovalis</i>                              | 2 |
| <i>Adenocarpus decorticans</i>                         | 2 |
| <i>Arenaria tetraquetra</i> subsp. <i>imbricata</i>    | 2 |
| <i>Thymus serpylloides</i>                             | 2 |
| <i>Dianthus brachyanthus</i>                           | 2 |
| <i>Juniperus hemisphaerica</i>                         | 2 |
| <i>Haloragaceae</i>                                    | 2 |
| <i>Cistus monspeliensis</i>                            | 2 |
| <i>Quercus pyrenaica</i>                               | 2 |
| <i>Aristolochia longa</i>                              | 2 |
| <i>Phlomis crinita</i>                                 | 2 |
| <i>Lonicera xylosteum</i>                              | 2 |
| <i>Ononis spinosa</i> subsp. <i>antiquorum</i>         | 2 |
| <i>Hedera helix</i>                                    | 1 |
| <i>Salix triandra</i>                                  | 1 |
| <i>Salix eleagnos</i> subsp. <i>angustifolia</i>       | 1 |
| <i>Clematis vitalba</i>                                | 1 |
| <i>Salix atrocinerea</i>                               | 1 |
| <i>Antirrhinum hispanicum</i> subsp. <i>hispanicum</i> | 1 |
| <i>Ficus carica</i>                                    | 1 |
| <i>Phlomis purpurea</i>                                | 1 |
| <i>Helianthemum ledifolium</i>                         | 1 |
| <i>Populus alba</i>                                    | 1 |
| <i>Daphne gnidium</i>                                  | 1 |
| <i>Coriaria myrtifolia</i>                             | 1 |
| <i>Lonicera arborea</i>                                | 1 |

# Sierra Nevada NP

|                                                          |   |
|----------------------------------------------------------|---|
| <i>Teucrium polium</i> subsp. <i>montanum</i>            | 2 |
| <i>Erodium boissieri</i>                                 | 2 |
| <i>Arenaria armerina</i> subsp. <i>caesia</i>            | 2 |
| <i>Sideritis incana</i> subsp. <i>virgata</i>            | 2 |
| <i>Thymus granatensis</i>                                | 2 |
| <i>Fumana ericoides</i>                                  | 2 |
| <i>Anthyllis tejedensis</i>                              | 2 |
| <i>Helianthemum pannosum</i>                             | 2 |
| <i>Arctostaphylos uva-ursi</i> subsp. <i>crassifolia</i> | 2 |
| <i>Lonicera splendida</i>                                | 2 |
| <i>Chamaespartium undulatum</i>                          | 2 |
| <i>Arenaria grandiflora</i>                              | 2 |
| <i>Acer granatense</i>                                   | 2 |
| <i>Erinacea anthyllis</i>                                | 2 |
| <i>Rosa pimpinellifolia</i>                              | 2 |
| <i>Ononis aragonensis</i>                                | 2 |
| <i>Juniperus sabina</i> subsp. <i>humilis</i>            | 2 |
| <i>Sorbus aria</i>                                       | 2 |
| <i>Quercus faginea</i>                                   | 2 |
| <i>Lonicera arborea</i>                                  | 2 |
| <i>Pinus sylvestris</i> var. <i>nevadensis</i>           | 2 |
| <i>Salvia oxyodon</i>                                    | 2 |
| <i>Rhamnus saxatilis</i>                                 | 2 |
| <i>Rosa sicula</i>                                       | 2 |
| <i>Arenaria modesta</i>                                  | 2 |
| <i>Santolina elegans</i>                                 | 2 |
| <i>Fumana procumbens</i>                                 | 2 |
| <i>Helianthemum croceum</i> subsp. <i>croceum</i>        | 2 |
| <i>Vella spinosa</i>                                     | 2 |
| <i>Prunus prostrata</i>                                  | 2 |
| <i>Astragalus granatensis</i>                            | 2 |
| <i>Teucrium webbium</i>                                  | 1 |
| <i>Ononis aragonensis</i>                                | 1 |
| <i>Cotoneaster granatensis</i>                           | 1 |
| <i>Cistus albidus</i>                                    | 2 |
| <i>Rosmarinus officinalis</i>                            | 2 |
| <i>Retama sphaerocarpa</i>                               | 2 |
| <i>Phlomis lychnitis</i>                                 | 2 |
| <i>Marrubium vulgare</i>                                 | 2 |
| <i>Clematis flammula</i>                                 | 2 |
| <i>Spartium junceum</i>                                  | 2 |
| <i>Rhamnus lycioides</i> subsp. <i>velutinus</i>         | 2 |
| <i>Bupleurum gibraltarium</i>                            | 2 |
| <i>Juniperus phoenicea</i>                               | 2 |
| <i>Pistacia terebinthus</i>                              | 2 |
| <i>Anarrhinum laxiflorum</i>                             | 2 |

# Sierra Nevada NP

|                                                         |   |
|---------------------------------------------------------|---|
| <i>Thymelaea elliptica</i>                              | 2 |
| <i>Antirrhinum hispanicum</i> subsp. <i>hispanicum</i>  | 2 |
| <i>Hormathophylla longicaulis</i>                       | 2 |
| <i>Cytisus scoparius</i> subsp. <i>reverchonii</i>      | 2 |
| <i>Digitalis obscura</i>                                | 2 |
| <i>Echinospartum boissieri</i>                          | 2 |
| <i>Prunus ramburii</i>                                  | 2 |
| <i>Rosa micrantha</i>                                   | 2 |
| <i>Cotoneaster granatensis</i>                          | 2 |
| <i>Teucrium webbianum</i>                               | 2 |
| <i>Astragalus monspessulanus</i>                        | 2 |
| <i>Hedera helix</i>                                     | 2 |
| <i>Salix eleagnos</i> subsp. <i>angustifolia</i>        | 2 |
| <i>Daphne oleoides</i>                                  | 2 |
| <i>Rosa stylosa</i> subsp. <i>nevadensis</i>            | 2 |
| <i>Rosa pouzinii</i>                                    | 2 |
| <i>Satureja intricata</i>                               | 2 |
| <i>Juniperus hemisphaerica</i>                          | 3 |
| <i>Astragalus sempervirens</i> subsp. <i>nevadensis</i> | 3 |
| <i>Juniperus sabina</i> subsp. <i>humilis</i>           | 3 |
| <i>Reseda complicata</i>                                | 3 |
| <i>Helianthemum croceum</i> subsp. <i>croceum</i>       | 3 |
| <i>Prunus prostrata</i>                                 | 3 |
| <i>Artemisia absinthium</i>                             | 2 |
| <i>Chaerophyllum hirsutum</i>                           | 3 |
| <i>Dianthus lusitanus</i>                               | 2 |
| <i>Hormathophylla spinosa</i>                           | 2 |
| <i>Antirrhinum rupestre</i>                             | 2 |
| <i>Chaerophyllum hirsutum</i>                           | 2 |
| <i>Ruscus aculeatus</i>                                 | 2 |
| <i>Crataegus laciniata</i>                              | 2 |
| <i>Fraxinus angustifolia</i>                            | 2 |
| <i>Clematis vitalba</i>                                 | 2 |
| <i>Acer monspessulanum</i>                              | 2 |
| <i>Arenaria tetraquetra</i> subsp. <i>imbricata</i>     | 3 |
| <i>Anarrhinum laxiflorum</i>                            | 3 |
| <i>Genista versicolor</i>                               | 3 |
| <i>Dianthus brachyanthus</i>                            | 3 |
| <i>Chaenorhinum glareosum</i>                           | 3 |
| <i>Salix hastata</i> subsp. <i>sierrae-nevadae</i>      | 3 |
| <i>Sideritis glacialis</i>                              | 3 |
| <i>Helianthemum piliferum</i>                           | 2 |
| <i>Astragalus vesicarius</i>                            | 2 |
| <i>Helianthemum canum</i>                               | 2 |
| <i>Ononis cristata</i>                                  | 2 |
| <i>Arenaria armerina</i> subsp. <i>elongata</i>         | 2 |

# Sierra Nevada NP

|                                                    |   |
|----------------------------------------------------|---|
| <i>Cytisus scoparius</i>                           | 2 |
| <i>Arenaria armerina</i> subsp. <i>caesia</i>      | 3 |
| <i>Cytisus galianoi</i>                            | 2 |
| <i>Putoria calabrica</i>                           | 2 |
| <i>Dittrichia viscosa</i>                          | 2 |
| <i>Antirrhinum hispanicum</i>                      | 2 |
| <i>Thymus orospedanus</i>                          | 2 |
| <i>Jasonia glutinosa</i>                           | 2 |
| <i>Dianthus malacitanus</i>                        | 2 |
| <i>Rhamnus myrtifolia</i>                          | 2 |
| <i>Phagnalon sordidum</i>                          | 2 |
| <i>Arenaria pungens</i> subsp. <i>pungens</i>      | 3 |
| <i>Artemisia absinthium</i>                        | 3 |
| <i>Genista umbellata</i>                           | 2 |
| <i>Thymus gadorensis</i>                           | 2 |
| <i>Teucrium compactum</i>                          | 2 |
| <i>Osyris alba</i>                                 | 2 |
| <i>Ononis speciosa</i>                             | 1 |
| <i>Artemisia herba-alba</i>                        | 1 |
| <i>Artemisia barrelieri</i>                        | 2 |
| <i>Thymelaea hirsuta</i>                           | 2 |
| <i>Cistus salviifolius</i>                         | 2 |
| <i>Rosa corymbifera</i>                            | 2 |
| <i>Betula pendula</i> subsp. <i>fontqueri</i>      | 2 |
| <i>Rosa</i>                                        | 2 |
| <i>Salix caprea</i>                                | 2 |
| <i>Thymelaea tartonraira</i>                       | 2 |
| <i>Cistus clusii</i>                               | 2 |
| <i>Nepeta granatensis</i>                          | 2 |
| <i>Cistus laurifolius</i>                          | 2 |
| <i>Argyrolobium zanonii</i>                        | 2 |
| <i>Fumana thymifolia</i>                           | 2 |
| <i>Halimium viscosum</i>                           | 2 |
| <i>Helianthemum hirtum</i>                         | 2 |
| <i>Rosa canina</i>                                 | 2 |
| <i>Genista umbellata</i>                           | 4 |
| <i>Cistus albidus</i>                              | 4 |
| <i>Olea europaea</i> var. <i>sylvestris</i>        | 4 |
| <i>Crataegus monogyna</i> subsp. <i>brevispina</i> | 4 |
| <i>Phlomis purpurea</i> subsp. <i>almeriensis</i>  | 4 |
| <i>Lavandula stoechas</i> subsp. <i>caesia</i>     | 4 |
| <i>Asparagus acutifolius</i>                       | 4 |
| <i>Rosa canina</i>                                 | 4 |
| <i>Quercus ilex</i> subsp. <i>ballota</i>          | 4 |
| <i>Thymus baeticus</i>                             | 4 |
| <i>Helichrysum serotinum</i>                       | 4 |

# Sierra Nevada NP

|                                                         |   |
|---------------------------------------------------------|---|
| <i>Phlomis purpurea</i> subsp. <i>almeriensis</i>       | 2 |
| <i>Thymus baeticus</i>                                  | 2 |
| <i>Phlomis</i> x <i>compositae</i>                      | 2 |
| <i>Aristolochia paucinervis</i>                         | 2 |
| <i>Halimium atriplicifolium</i>                         | 2 |
| <i>Castanea sativa</i>                                  | 2 |
| <i>Dorycnium rectum</i>                                 | 2 |
| <i>Alnus glutinosa</i>                                  | 2 |
| <i>Populus nigra</i>                                    | 2 |
| <i>Sorbus aucuparia</i>                                 | 2 |
| <i>Prunus avium</i>                                     | 2 |
| <i>Thymus mastichina</i>                                | 3 |
| <i>Thymus orospedanus</i>                               | 3 |
| <i>Artemisia barrelieri</i>                             | 3 |
| <i>Berberis hispanica</i>                               | 3 |
| <i>Vella spinosa</i>                                    | 3 |
| <i>Santolina canescens</i>                              | 3 |
| <i>Bupleurum spinosum</i>                               | 3 |
| <i>Marrubium supinum</i>                                | 3 |
| <i>Astragalus sempervirens</i> subsp. <i>nevadensis</i> | 2 |
| <i>Reseda complicata</i>                                | 2 |
| <i>Arenaria pungens</i> subsp. <i>pungens</i>           | 2 |
| <i>Teucrium polium</i> subsp. <i>montanum</i>           | 3 |
| <i>Arenaria montana</i> subsp. <i>montana</i>           | 3 |
| <i>Cytisus grandiflorus</i>                             | 2 |
| <i>Retama sphaerocarpa</i>                              | 4 |
| <i>Quercus coccifera</i>                                | 4 |
| <i>Cytisus fontanesii</i> subsp. <i>fontanesii</i>      | 4 |
| <i>Genista scorpius</i>                                 | 4 |
| <i>Cytisus scoparius</i> subsp. <i>reverchonii</i>      | 4 |
| <i>Genista speciosa</i>                                 | 4 |
| <i>Ononis speciosa</i>                                  | 4 |
| <i>Thymus mastichina</i>                                | 4 |
| <i>Dorycnium pentaphyllum</i>                           | 4 |
| <i>Digitalis obscura</i>                                | 4 |
| <i>Ulex parviflorus</i>                                 | 4 |
| <i>Daphne gnidium</i>                                   | 4 |
| <i>Juniperus oxycedrus</i>                              | 4 |
| <i>Lavandula lanata</i>                                 | 4 |
| <i>Teucrium capitatum</i>                               | 4 |
| <i>Rhamnus catharticus</i>                              | 2 |
| <i>Prunus spinosa</i>                                   | 2 |
| <i>Populus alba</i>                                     | 2 |
| <i>Satureja obovata</i>                                 | 2 |
| <i>Teucrium lusitanicum</i>                             | 2 |
| <i>Phlomis purpurea</i>                                 | 2 |

# Sierra Nevada NP

|                                                           |   |
|-----------------------------------------------------------|---|
| <i>Phlomis lychnitis</i>                                  | 4 |
| <i>Thymus longiflorus</i>                                 | 4 |
| <i>Fumana ericoides</i>                                   | 4 |
| <i>Cistus clusii</i>                                      | 4 |
| <i>Rosmarinus officinalis</i>                             | 4 |
| <i>Satureja obovata</i>                                   | 4 |
| <i>Rhamnus oleoides</i>                                   | 4 |
| <i>Sideritis glacialis</i>                                | 2 |
| <i>Dianthus lusitanus</i>                                 | 3 |
| <i>Antirrhinum rupestre</i>                               | 3 |
| <i>Artemisia</i>                                          | 3 |
| <i>Arenaria armerina</i> subsp. <i>armerina</i>           | 2 |
| <i>Artemisia</i>                                          | 2 |
| <i>Thymus gadorensis</i>                                  | 4 |
| <i>Prunus ramburii</i>                                    | 4 |
| <i>Adenocarpus decorticans</i>                            | 4 |
| <i>Rosa micrantha</i>                                     | 4 |
| <i>Artemisia glutinosa</i>                                | 3 |
| <i>Arenaria armerina</i> subsp. <i>elongata</i>           | 3 |
| <i>Launaea lanifera</i>                                   | 4 |
| <i>Artemisia barrelieri</i>                               | 4 |
| <i>Lavandula multifida</i>                                | 4 |
| <i>Anthyllis terniflora</i>                               | 4 |
| <i>Thymelaea hirsuta</i>                                  | 4 |
| <i>Salsola genistoides</i>                                | 4 |
| <i>Asparagus stipularis</i>                               | 4 |
| <i>Santolina canescens</i>                                | 4 |
| <i>Artemisia glutinosa</i>                                | 4 |
| <i>Ononis spinosa</i> subsp. <i>antiquorum</i>            | 4 |
| <i>Helianthemum cinereum</i> subsp. <i>rubellum</i>       | 4 |
| <i>Marrubium supinum</i>                                  | 4 |
| <i>Teucrium compactum</i>                                 | 4 |
| <i>Santolina chamaecyparissus</i> subsp. <i>squarrosa</i> | 4 |
| <i>Atriplex halimus</i>                                   | 4 |
| <i>Salsola oppositifolia</i>                              | 4 |
| <i>Genista spartioides</i> subsp. <i>retamoides</i>       | 4 |
| <i>Hammada articulata</i>                                 | 4 |
| <i>Atriplex glauca</i>                                    | 4 |
| <i>Lavatera oblongifolia</i>                              | 2 |
| <i>Rhamnus oleoides</i>                                   | 2 |
| <i>Helichrysum stoechas</i>                               | 4 |
| <i>Fumana thymifolia</i>                                  | 4 |
| <i>Thymus zygis</i> subsp. <i>gracilis</i>                | 4 |
| <i>Helianthemum almeriense</i>                            | 4 |
| <i>Lonicera periclymenum</i> subsp. <i>hispanica</i>      | 4 |
| <i>Rubus ulmifolius</i>                                   | 4 |



# Sierra Nevada NP

|                                              |   |
|----------------------------------------------|---|
| <i>Salix atrocinerea</i>                     | 4 |
| <i>Hedera helix</i>                          | 4 |
| <i>Rosa pouzinii</i>                         | 4 |
| <i>Cytisus grandiflorus</i>                  | 4 |
| <i>Genista florida</i>                       | 2 |
| <i>Berberis hispanica</i>                    | 4 |
| <i>Echinopartum boissieri</i>                | 4 |
| <i>Erinacea anthyllis</i>                    | 4 |
| <i>Dorycnium rectum</i>                      | 4 |
| <i>Dianthus brachyanthus</i>                 | 4 |
| <i>Dorycnium pentaphyllum</i>                | 2 |
| <i>Helianthemum almeriense</i>               | 2 |
| <i>Halimium viscosum</i>                     | 4 |
| <i>Bupleurum spinosum</i>                    | 4 |
| <i>Helianthemum croceum subsp. croceum</i>   | 4 |
| <i>Anarrhinum laxiflorum</i>                 | 4 |
| <i>Phlomis crinita</i>                       | 4 |
| <i>Helianthemum ledifolium</i>               | 4 |
| <i>Sideritis pusilla subsp. pusilla</i>      | 4 |
| <i>Thymus hyemalis</i>                       | 4 |
| <i>Teucrium rotundifolium</i>                | 4 |
| <i>Rhamnus myrtifolius</i>                   | 4 |
| <i>Teucrium eriocephalum</i>                 | 4 |
| <i>Populus alba</i>                          | 4 |
| <i>Tamarix africana</i>                      | 4 |
| <i>Coriaria myrtifolia</i>                   | 4 |
| <i>Salix pedicellata</i>                     | 4 |
| <i>Clematis flammula</i>                     | 4 |
| <i>Nerium oleander</i>                       | 4 |
| <i>Bupleurum gibraltaricum</i>               | 4 |
| <i>Tamarix gallica</i>                       | 4 |
| <i>Tamarix canariensis</i>                   | 4 |
| <i>Cistus ladanifer</i>                      | 4 |
| <i>Anthyllis cytisoides</i>                  | 4 |
| <i>Phlomis purpurea</i>                      | 4 |
| <i>Teucrium gnaphalodes</i>                  | 4 |
| <i>Thymus membranaceus</i>                   | 4 |
| <i>Rubia peregrina</i>                       | 2 |
| <i>Crataegus monogyna</i>                    | 2 |
| <i>Ballota hirsuta</i>                       | 2 |
| <i>Helichrysum italicum subsp. serotinum</i> | 2 |
| <i>Teucrium capitatum</i>                    | 2 |
| <i>Artemisia herba-alba</i>                  | 4 |
| <i>Nicotiana glauca</i>                      | 4 |
| <i>Cistus ladanifer</i>                      | 2 |
| <i>Arenaria armerina subsp. armerina</i>     | 3 |

# Sierra Nevada NP

|                                                      |   |
|------------------------------------------------------|---|
| <i>Thymus gadorensis</i>                             | 3 |
| <i>Ononis cristata</i>                               | 3 |
| <i>Teucrium polium</i>                               | 2 |
| <i>Linum suffruticosum</i>                           | 2 |
| <i>Lithodora fruticosa</i>                           | 2 |
| <i>Ruta angustifolia</i>                             | 4 |
| <i>Bupleurum spinosum</i>                            | 1 |
| <i>Teucrium polium</i>                               | 1 |
| <i>Lithodora fruticosa</i>                           | 1 |
| <i>Helianthemum hirtum</i>                           | 1 |
| <i>Linum suffruticosum</i>                           | 1 |
| <i>Genista cinerea</i> subsp. <i>speciosa</i>        | 1 |
| <i>Ruta angustifolia</i>                             | 2 |
| <i>Ulex parviflorus</i> subsp. <i>parviflorus</i>    | 2 |
| <i>Euphorbia characias</i> subsp. <i>characias</i>   | 2 |
| <i>Euphorbia nicaeensis</i> subsp. <i>nicaeensis</i> | 2 |
| <i>Teucrium capitatum</i> subsp. <i>gracillimum</i>  | 4 |
| <i>Ulex parviflorus</i> subsp. <i>parviflorus</i>    | 4 |
| <i>Rhamnus lycioides</i> subsp. <i>velutinus</i>     | 4 |
| <i>Euphorbia characias</i> subsp. <i>characias</i>   | 4 |
| <i>Rubia peregrina</i>                               | 4 |
| <i>Ballota hirsuta</i> subsp. <i>hirsuta</i>         | 4 |
| <i>Lonicera etrusca</i>                              | 2 |
| <i>Clinopodium vulgare</i>                           | 2 |
| <i>Digitalis purpurea</i> subsp. <i>purpurea</i>     | 2 |
| <i>Pteridium aquilinum</i> subsp. <i>aquilinum</i>   | 2 |
