# Supplementary material
Source: MDPI journal article supplement (https://www.mdpi.com/2072-4292/8/9/780)

**Figure 1.** Vegetation types of the Okavango Delta World Heritage site (Mendelsohn et al. 2010).

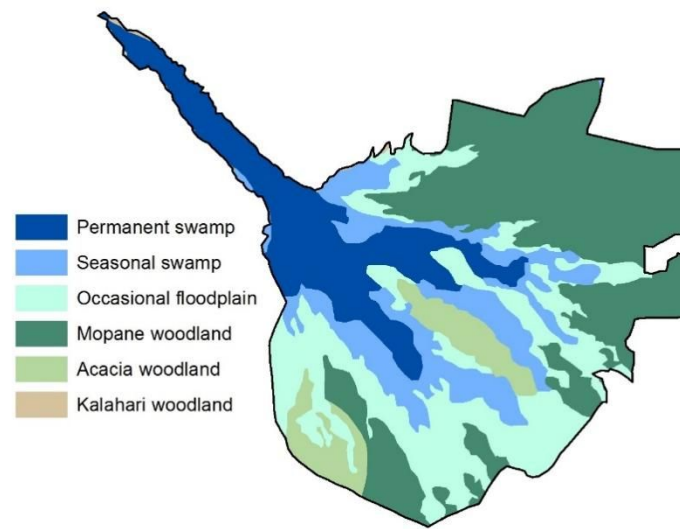

**Figure 2.** Vegetation types of the Virunga National Park (UNESCO 1979).

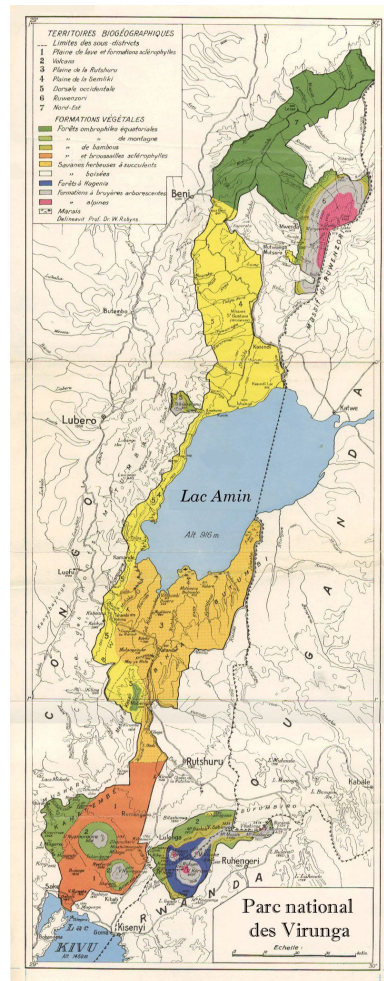

**Figure 3.** Landscape types of the Canaima National Park (Delgado *et al.* 2009).

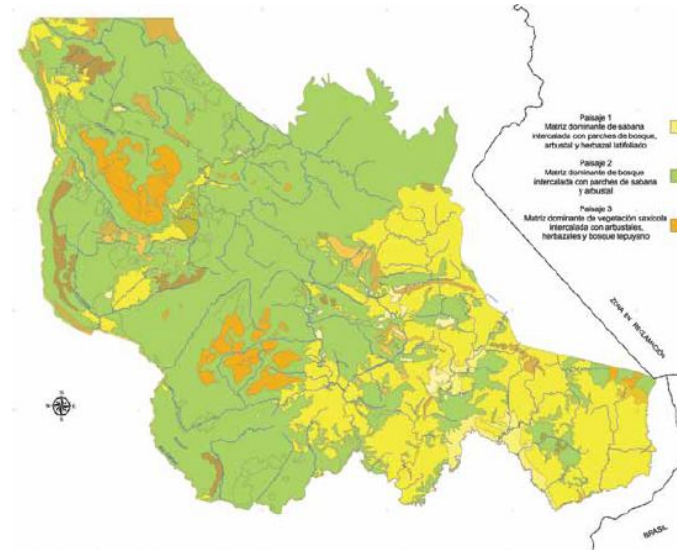

**Figure 4.** Ecological subregions of the Kakadu National Park (Bastin 2008).

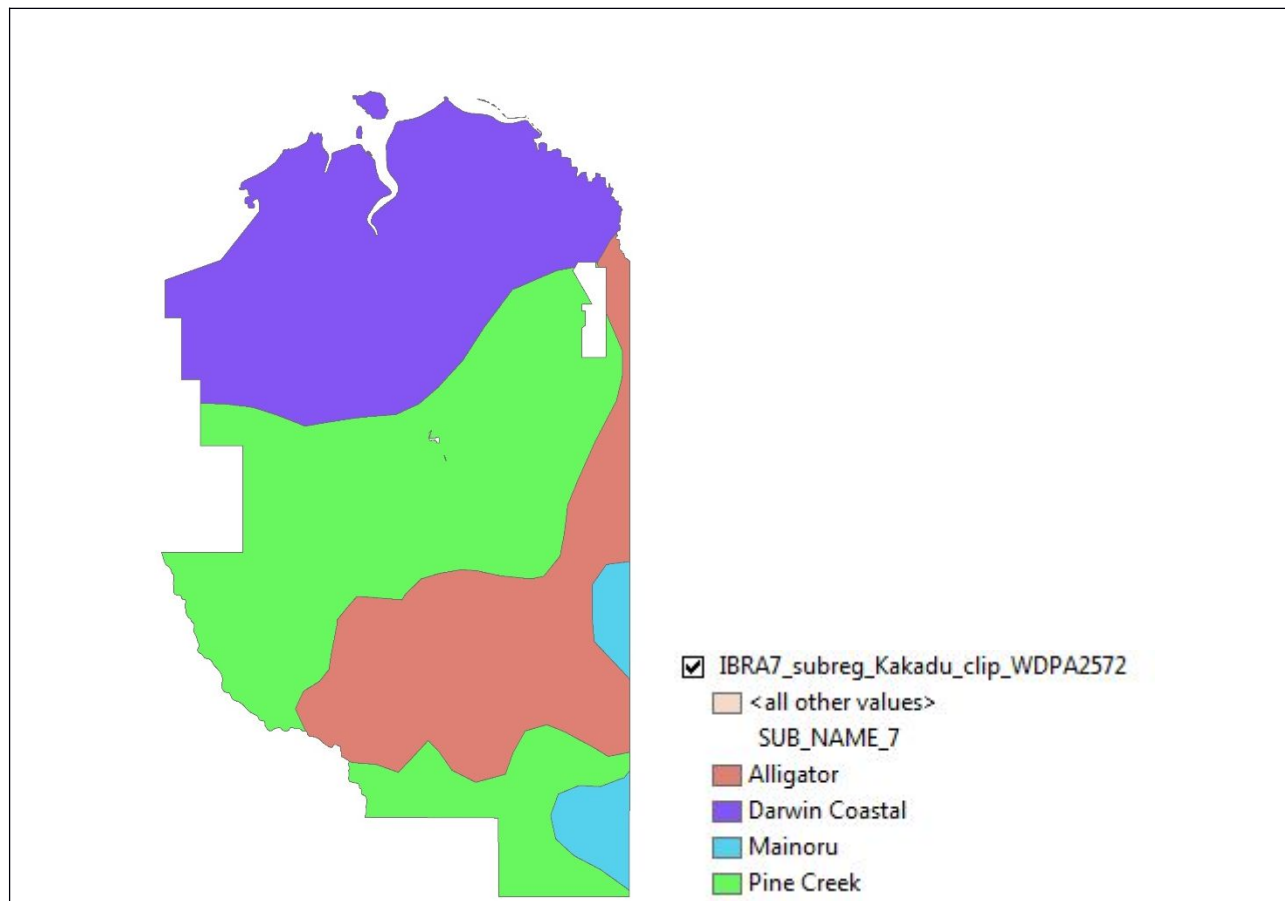

Supplement: s1 [file s1]
