# Supplementary material
Source: MDPI journal article supplement (https://www.mdpi.com/2072-4292/8/9/780)
Supplement: s1 [file s1]

| Variable                                                 | Dates     | Source                                                                                                                                                                                                                                                                                                                                                                                                                                                                                                                                                                                                                                                                                                                                                                                                                                                                                                                                                                                                                                                                                                                                                                                                                                                                                                                                                                                                                                                                                                                                                                                                                                                                                                                              |
|----------------------------------------------------------|-----------|-------------------------------------------------------------------------------------------------------------------------------------------------------------------------------------------------------------------------------------------------------------------------------------------------------------------------------------------------------------------------------------------------------------------------------------------------------------------------------------------------------------------------------------------------------------------------------------------------------------------------------------------------------------------------------------------------------------------------------------------------------------------------------------------------------------------------------------------------------------------------------------------------------------------------------------------------------------------------------------------------------------------------------------------------------------------------------------------------------------------------------------------------------------------------------------------------------------------------------------------------------------------------------------------------------------------------------------------------------------------------------------------------------------------------------------------------------------------------------------------------------------------------------------------------------------------------------------------------------------------------------------------------------------------------------------------------------------------------------------|
| Slope                                                    | 2000      | <p>Slope was derived from the Shuttle Radar Topography Mission (SRTM 30).</p> <p><i>Reference:</i> USGS (2004). Shuttle Radar Topography Mission, 1 Arc Second scene SRTM_u03_n008e004, Unfilled Unfinished 2.0, Global Land Cover Facility, University of Maryland, College Park, Maryland, February 2000.</p> <p>Digital data accessed 1 July 2013 from <a href="http://www2.jpl.nasa.gov/srtm/">http://www2.jpl.nasa.gov/srtm/</a></p>                                                                                                                                                                                                                                                                                                                                                                                                                                                                                                                                                                                                                                                                                                                                                                                                                                                                                                                                                                                                                                                                                                                                                                                                                                                                                           |
| Biotemperature<br><br>Precipitation<br><br>EPR (Aridity) | 1960-1990 | <p>Climate variables (annual biotemperature, annual precipitation, annual evapotranspiration/precipitation ratio (EPR)) are derived from WorlClim. WordClim provides gridded maps of current (1950-2000) and future climate variables at different latitude-longitude resolutions, i.e., 10 minutes, 5 minutes, 2.5 minutes and 30 seconds. The dataset for current climate is the result of a spatial interpolation process using splines applied to measurements from climate stations. The 30 seconds resolution adopted here corresponds to grid cells of 0.86 km<sup>2</sup> at equator, usually referred to as a 1 km grid. The dataset representing current conditions was selected: this covers the period from 1960-1990.</p> <p>The variables have been computed according to the definitions of Holdridge, 1947. Annual means were calculated for all variables, after the following pre-processing:<br/>           EPR was produced by dividing evapotranspiration by precipitation, with an upper limit of 100.<br/>           The precipitation data was used as supplied.<br/>           For biotemperature, values below 0 were set to 0, and in the final average, any values below 0.1 were set to 0.1.</p> <p><i>References:</i><br/>           Hijmans, R., S. E. Cameron, J. L. Parra, P. G. Jones, and A. Jarvis (2005), Very high resolution interpolated climate surfaces for global land areas, International Journal of Climatology, 25, 1965-1978.<br/>           Holdridge, L. R. (1947), Determination of world plant formations from simple climatic data, Science, 105, 367-368.</p> <p>Digital data accessed 1 July 2013 from <a href="http://www.worldclim.org/">http://www.worldclim.org/</a></p> |
| % woody vegetation<br><br>% herbaceous cover             | 2010      | <p>Derived from the Vegetation Continuous Fields collection which contains proportional estimates for vegetative cover types: woody vegetation, herbaceous vegetation, and bare ground. Only the first two variables are used, since the third is a function of the first two. The product is derived from all seven bands of the MODerate-resolution Imaging Spectroradiometer (MODIS)</p>                                                                                                                                                                                                                                                                                                                                                                                                                                                                                                                                                                                                                                                                                                                                                                                                                                                                                                                                                                                                                                                                                                                                                                                                                                                                                                                                         |

|                          |                                               |                                                                                                                                                                                                                                                                                                                                                                                                                                                                                                                                                                                                                       |
|--------------------------|-----------------------------------------------|-----------------------------------------------------------------------------------------------------------------------------------------------------------------------------------------------------------------------------------------------------------------------------------------------------------------------------------------------------------------------------------------------------------------------------------------------------------------------------------------------------------------------------------------------------------------------------------------------------------------------|
|                          |                                               | <p>sensor on board NASA's Terra satellite.</p> <p><i>Reference:</i> DiMiceli, C.M., M.L. Carroll, R.A. Sohlberg, C. Huang, M.C. Hansen, and J.R.G. Townshend (2011), Annual Global Automated MODIS Vegetation Continuous Fields (MOD44B) at 250 m Spatial Resolution for Data Years Beginning Day 65, 2000 - 2010, Collection 5 Percent Tree Cover, University of Maryland, College Park, MD, USA.</p> <p>Digital data accessed 1 July 2013 from <a href="http://glcf.umd.edu/data/vcf/">http://glcf.umd.edu/data/vcf/</a></p>                                                                                        |
| NDVI max<br><br>NDVI min | 2001-2010<br>(Average of minimum and maximum) | <p>The MODIS Normalized Difference Vegetation Index (NDVI) data set is available on a 16 day basis for the ten year period between 2001 and 2010. The product is derived from bands 1 and 2 of the MODerate-resolution Imaging Spectroradiometer on board NASA's Terra satellite.</p> <p><i>Reference:</i> Carroll, M.L., C.M. DiMiceli, R.A. Sohlberg, and J.R.G. Townshend (2004). 250m MODIS Normalized Difference Vegetation Index, University of Maryland, College Park, Maryland.</p> <p>Digital data accessed 1 July 2013 from <a href="http://glcf.umd.edu/data/ndvi/">http://glcf.umd.edu/data/ndvi/</a></p> |
| NDWI                     | 2006-2010<br>(Maximum)                        | <p>NDWI was calculated by the MARS unit of the Joint Research Centre (now the Food Security Unit) from spectral bands in the 10-day composites of SPOT-VGT. The maximum value for the 5-year period was extracted from the collection of 10-day composites.</p>                                                                                                                                                                                                                                                                                                                                                       |
